# Supplementary material for: Ataluren Binds to Multiple Protein Synthesis Apparatus Sites and Competitively Inhibits Release Factor Dependent Termination
Source: Research Square preprint supplement (doi:10.21203/rs.3.rs-1451662/v1), 2022-03-23
Supplement: Supplementary file 1 [file 05878981b320802243ad7f16.xlsx]

## Sheet: Table 1
Target	Experiment	Competing Ligand	18S A1195/ I: 18S 1151 - 1206	26S-A3093/ II: 26S 3069 - 3113	26SA2669; A2672/ III: 26S 2638 - 2702	CrPV-IRES U177;G186 IV: 156-221
Stop- POST5	PAL, 300 μM AzAt	none	0.0166472	0.00407	0.009689	0.0261243
			0.0132642	0.003921	0.011673	0.0373247
			0.0166472
		eRF1/eRF3/ GDPNP	0.000907267	0.002466	0.002067	0.0336029
			0.000489967	0.001082	0.001831	0.0250809
		eRF1	0.00146416	0.00209122	0.00199861
			0.00243195	0.00112397	0.00207695
	PAL, 30 μM AzAt	none	0.00239998	0.000369	0.001584
			0.00285433	0.000215	0.00099
		Ataluren, 500 μM	0.000632535	0.000549	0.001273
			0.000485554	0.000741	0.000738
		GJ072, 150 μM	0.000994532	0.000802	0.000662
			0.00108099	0.000625	0.00083
	PRE, 300 μM AzAt	none	0.00010049	0.0003961	0.0001474
			0.000136	0.00057	0.0004318
80S-IRES	PAL, 300 μM AzAt	none	0.0141533	0.003986	0.010109
			0.00832002	0.0055306	0.0112795
			0.00855	0.005556	0.0089272
		eRF1/eRF3/ GDPNP	0.006087	0.00422	0.006743
			0.00521041	0.0064103	0.0101676
				0.0059543	0.0111608
