# Supplementary material for: Ataluren Binds to Multiple Protein Synthesis Apparatus Sites and Competitively Inhibits Release Factor Dependent Termination
Source: Research Square preprint supplement (doi:10.21203/rs.3.rs-1451662/v1), 2022-03-23
Supplement: Supplementary file 5 [file 0b7f36028abde20d4277095e.xlsx]

## Sheet: fig.S1
AzAt (uM)	Readthrough efficacy replicate data
0	0	0
10	0.0061	0.0082
25	0.0112	0.0249
50	0.102	0.0814
125	0.1943	0.1466
175	0.1659	0.1196
250	0.1306	0.1789

## Sheet: fig.S2
AzAt (uM)	Stop-POST5		Stop-POST5 RNA
0	0	0	0	0
30	0.056901	0.032345	0.0930034	0.0836178
75			0.136604	0.137372
100	0.215027	0.382139
150			0.39872	0.468345
300	1.02055	0.929863	0.667065	0.737543
450			0.736007	0.884642
600	0.872943	1.1108	0.745051	0.810239

## Sheet: fig.S4
AzAt (uM)	eRF3 in solution				eRF3 partially within ternary complex
0	0	0			0	0	0	0
25					0.00166	0.00135	0.00191	0.00204
50	0.0179711	0.0138484			0.00188	0.00284	0.00281	0.00366
100	0.0168321	0.0217307			0.00339	0.00491	0.0078	0.00589
250	0.0355144	0.0408332			0.01155	0.01171	0.01043	0.01084
500	0.0859771	0.0796414			0.0324	0.02864	0.02833	0.02484
1000					0.03839	0.03928	0.02773	0.03208

## Sheet: fig.S6c
	mutation rate replicate
18S-A1195 PAL	0.010056	0.014763
18S-A1195 PRE	0.000568	0.001689
26S-A3093 PAL	0.002509	0.00399
26S-A3093 PRE	0.001477	0.001179
26S-A2752 PAL	0.002042	0.002461
26S-A2752 PRE	0.000455	0.000742
26S-A3557 PAL	0.001291	0.001456
26S-A3557 PRE	0.000655	0.000554
IRES-U177 PAL	0.00475087	0.00130607
IRES-U177 PRE	0.00196009	0.000656124
26S-G2851 PAL	0.008768	0.009748
26S-G2851 PRE	0.002211	0.004222
26S-A728 PAL	0.002769	0.002845
26S-A728 PRE	0.001681	0.001361
26S-A2362 PAL	0.00227179	0.001769
26S-A2362 PRE	0.001418	0.000866
26S-A2672 PAL	0.002364	0.001596
26S-A2672 PRE	0.001159	0.00079
26S-A3469 PAL	0.001368	0.001239
26S-A3469 PRE	0.000772	0.000517
IRES-G186 PAL	0.0219726	0.0131981
IRES-G186 PRE	0.0109693	0.0147834
26S-A1388 PAL	0.003396	0.003406
26S-A1388 PRE	0.001635	0.001722
26S-A1392 PAL	0.005986	0.001266
26S-A1392 PRE	0.003969	0.000702
26S-C255 PAL	0.009009	0.012964
26S-C255 PRE	0.004638	0.007192
26S-A1982 PAL	0.002988	0.000856
26S-A1982 PRE	0.001635	0.000511
26S-A2669 PAL	0.004073	0.00156
26S-A2669 PRE	0.002008	0.000938
18S-A265 PAL	0.002165	0.000917
18S-A265 PRE	0.001619	0.000576
18S-A365 PAL	0.001557	0.000883
18S-A365 PRE	0.001069	0.000556
18S-A699 PAL	0.001659	0.001734
18S-A699 PRE	0.000962	0.001111
18S-G476 PAL	0.002215	0.00485
18S-G476 PRE	0.001739	0.00313
26S-A808 PAL	0.001307	0.001294
26S-A808 PRE	0.000675	0.000852
26S-A1836 PAL	0.01463	0.011576
26S-A1836 PRE	0.014544	0.007694

## Sheet: fig. S11
AzAt (uM)					26S-PTC
					26S-2672 replicate		26S-2672 ave ± a.d	26S-3093 replicate		26S-3093 ave ± a.d	sum 2672 + 3093	Normalized sum
0					0	0	0	0	0	0	0	0
30
50					0.0614	0.0897	0.076 ± 0.014	0.014	0.0313	0.023 ± 0.009	0.098 ± 0.023	0.059 ± 0.014
75
100					0.0897	0.014	0.052 ± 0.038	0.0428	0.1106	0.077 ± 0.034	0.129 ± 0.072	0.077 ± 0.043
150
175					0.414	0.2626	0.338 ± 0.076	0.208	0.2294	0.219 ± 0.011	0.557 ± 0.086	0.335 ± 0.052
250					0.7064	0.5472	0.627 ± 0.080	0.3597	0.2983	0.329 ± 0.031	0.956 ± 0.110	0.575 ± 0.066
300
400					0.5902	0.8678	0.729 ± 0.139	0.592	0.5981	0.595 ± 0.000	1.324 ± 0.142	0.797 ± 0.085
450
600					0.8163	0.8147	0.816 ± 0.000	0.5441	0.7546	0.649 ± 0.105	1.465 ± 0.106	0.882 ± 0.064
