# Supplementary material for: Ataluren Binds to Multiple Protein Synthesis Apparatus Sites and Competitively Inhibits Release Factor Dependent Termination
Source: Research Square preprint supplement (doi:10.21203/rs.3.rs-1451662/v1), 2022-03-23
Supplement: Supplementary file 6 [file 99ddecfee2cfb4c4a05b9328.xlsx]

## Sheet: Table S1
	IRES		5.8S		5S		tRNA						IV: IRES 156-221		V: 26S 1413-1476
PRE300	0.000335564		0.000229302		0.000229302		0.0034675				pal300		0.0261243		0.0033165
PRE300-b	0.000162104		1.66157e-05		9.96939e-05		0.00470101						0.0373247		0.00288216
											pal300RF		0.0336029		0.002089
PAL300	0.0699187		0.00818263		0.0154134		0.0218775						0.0250809		0.001884
PAL300-b	0.0764137		0.00954146		0.0170174		0.0246985
											pal30		0.0028591		0.000225
													0.0017851		0.000178
PAL300eRFs	0.0583556		0.00796407		0.0116941		0.0228259
PAL300eRFs-b	0.0501781		0.00793689		0.0144862		0.0205766
											pal30ata		0.0019437		0.000385
													0.0015477		0.000304
PAL30	0.00748464		0.00254027		0.00180926		0.0027228
PAL30-b	0.00948239		0.00237648		0.00189436		0.00332574				pal30gj		0.0018154		0.000162
													0.0025029		0.000219
PAL30ata	0.00796096		0.00196957		0.00147093		0.00246466				pre		0.000815607		0.000152
PAL30ata-b	0.00725559		0.00178513		0.00145124		0.00203429						0.000158305		0.000172
PAL30GJ72	0.00486649		0.00145143		0.00150877		0.00221917
PAL30GJ72-b	0.00685069		0.00243227		0.00143483		0.00269885
